1 **Trait specificity mediated by alternative DNA-binding preferences of a single transcription**  
2 **factor in yeast.**

3  
4 **Authors:** Michael W. Dorrity<sup>1,2</sup>, Josh T. Cuperus<sup>1,3</sup>, Jolie A. Carlisle<sup>1</sup>, Stanley Fields<sup>1,3</sup>,  
5 Christine Queitsch<sup>1\*</sup>

6  
7 **Affiliations:**

8 <sup>1</sup> Department of Genome Sciences, University of Washington, Seattle, WA 98195

9 <sup>2</sup> Department of Biology, University of Washington, Seattle, WA 98195

10 <sup>3</sup> Howard Hughes Medical Institute, University of Washington, Seattle, WA 98195

11 <sup>4</sup> Department of Medicine, University of Washington, Seattle, WA 98195

12  
13 \* Correspondence to: queitsch@u.washington.edu

14  
15 **Abstract:** In the yeast *Saccharomyces cerevisiae* and other fungal species, the decision to mate  
16 or invade relies on a shared transcription factor, Ste12. Specificity toward invasion is attributed  
17 to Ste12 binding cooperatively with the co-factor Tec1. Here, we show that single amino acid  
18 mutations in the DNA-binding domain of Ste12 suffice to shift the preference of *S. cerevisiae*  
19 cells toward either mating or invasion, independent of Tec1. Mutations that result in a shift  
20 toward one or the other trait define two distinct regions of this domain, implying an alternative  
21 DNA-binding mode for each trait. Using binding site library selections, we show that Ste12  
22 variants that shift trait preference indeed favor alternative DNA-binding sites. We identify  
23 temperature-responsive Ste12 variants that promote increased invasion of *S. cerevisiae* only at  
24 high temperature, behavior more typical of a fungal pathogen. Lastly, we show that rare Ste12  
25 mutations confer Hsp90-dependent mating, even though wild-type Ste12 is not an Hsp90 client.  
26 In summary, we show that flexibility at the level of Ste12 DNA-binding mediates  
27 environmentally-sensitive control of two complex traits.

28  
29 In the yeast *S. cerevisiae*, mating is initiated by pheromone recognition, which activates an  
30 evolutionarily conserved G-protein-coupled MAPK pathway (1) (Fig. 1A). Invasion is initiated  
31 in response to changes in temperature and nutrient availability. The shared MAPKKK Ste11, a  
32 known client of Hsp90 (2), likely contributes to the environmental sensitivity of both traits.  
33 Specificity between mating and invasion pathways is generated at multiple levels. For example, a  
34 mating-specific scaffold protein, Ste5, guides kinase signal transduction to activate mating (3).  
35 Two MAP kinases, Fus3 and Kss1, have overlapping functions in mating but opposing functions  
36 in invasion (4). At the level of transcriptional control, the two pathways converge on Ste12,  
37 which interacts with cofactors to activate either mating or invasion. For mating, Ste12 can bind  
38 at pheromone-responsive genes as a homodimer or with the cofactors Mcm1 and Mat $\alpha$ 1 (5–7).  
39 For invasion, Ste12 has been proposed to bind cooperatively with Tec1 at invasion genes (8–10);  
40 an alternative model, however, posits that a complex of Ste12 and Tec1 act solely through Tec1  
41 binding sites (10). However, Tec1 is either is not present or not required for invasion in many  
42 fungal species, though nearly all species contain Ste12 (Fig. 1- Suppl. 1). We speculated that the  
43 highly conserved Ste12 DNA binding domain contributes to the choice between mating and  
44 invasion, possibly through alternative DNA binding modes.

45  
46

## 47 Results

48 To examine the interaction between mating and invasion, we used deep mutational scanning of a  
49 segment of Ste12's DNA-binding domain. We generated ~20,000 protein variants within 33  
50 amino acids of this domain, including single, double, and higher order amino acid mutants, and  
51 subjected yeast cells carrying this variant library to selection for either mating or invasion (Fig.  
52 1B, Fig. 1 – Suppl. 2, Fig. 1 - Suppl. 3). As a control, we employed selection for a third trait,  
53 response to osmotic stress, which shares upstream pathway components but does not involve  
54 Ste12. We expected that most *STE12* mutations would affect mating and invasion similarly,  
55 because the Ste12 DNA-binding domain is highly conserved among fungi and Ste12  
56 transcriptional activity is required for both traits. Indeed, we found positions in which almost any  
57 amino acid substitution was highly deleterious to both mating and invasion (Fig. 1C, 1D, Fig. 1 –  
58 Suppl. 3). Conservation is only partially predictive for these results as some of these positions  
59 are invariant among fungi (W156, C144), whereas others are not (K149, Q151, K152).  
60 Unexpectedly, our mutational analysis also revealed 'separation-of-function' mutations, which  
61 primarily reduced either mating or invasion. Substitutions with mostly deleterious effects on  
62 mating clustered in residues N-terminal to the conserved W156 (designated region I), while  
63 substitutions with deleterious effects on invasion appeared more frequently C-terminal to W156  
64 (designated region II). Substitutions that increased mating were rare. By contrast, substitutions at  
65 some positions, almost all within region I, increased invasion, and these substitutions also  
66 decreased mating. Thus, mutations in the Ste12 DNA-binding domain can impose preference for  
67 mating or invasion rather than similarly affecting both traits.

68  
69 As these results suggested that the Ste12 DNA-binding domain itself can modulate the mating  
70 versus invasion preference, we further explored the apparent structure of mutational effects  
71 through double mutant analysis (Fig. 2A). For each pair of positions, we obtained the functional  
72 score for mating and for invasion due to every double mutant combination that included this pair.  
73 We used these scores to calculate a mean effect on the two traits for each set of double mutant  
74 combinations (Fig. 2A, example pair indicated). This analysis confirmed the bipartite  
75 arrangement of the mutagenized segment, split by the central W156 (Fig. 2A). Double mutants  
76 involving two positions in region I were mostly defective for mating, while those involving two  
77 positions in region II were mostly defective for invasion. Double mutants between regions I and  
78 II showed variability in mutational effects, with some pairwise combinations increasing mating  
79 and others decreasing mating; the effects on invasion, however, for these same combinations did  
80 not follow the same pattern. For example, for all variants with a mutation at K150 in region I, the  
81 deleterious effect on mating could be rescued slightly, depending on the position mutated in  
82 region II (examples highlighted in Fig. 2A, Fig. 2 – Suppl. 2). This pattern was not maintained  
83 for invasion, suggesting that K150 affects invasion-specific function differently.

84  
85 We calculated a "specificity score" for single mutations as the ratio of their effects on mating and  
86 invasion (Fig. 2B). The distribution had a strong negative skew, indicating that most single  
87 mutations shifted trait preference toward invasion. This distribution, along with the rarity of  
88 variants that increased mating above the wild-type level, leads us to speculate that wild-type *S.*  
89 *cerevisiae* Ste12 promotes mating more readily than invasion.

90  
91 To explore the apparent tradeoff between mating and invasion in more detail, we used the Pareto  
92 front concept (11). This concept, rooted in engineering and economics, defines all feasible

93 solutions for optimizing performance in two essential tasks; here, we consider all feasible  
94 genotypes that affect mating or invasion. We plotted the single mutation mean positional scores  
95 for both traits, identifying positions close to the Pareto front that show increased invasion and  
96 deleterious effects on mating. (Fig. 2C, see also Fig. 2 – Suppl. 3). Positions well below the  
97 Pareto front, including most prominently W156, had deleterious effects on both traits. These  
98 positions are significantly more conserved among fungi, consistent with variation at these sites  
99 being disfavored given the constraint on Ste12 to maintain both mating and invasion function in  
100 the fungal lineage (Fig. 2D).

101  
102 Region I or II mutations did not shift the preference for mating or invasion uniformly; rather,  
103 effects were position-specific. For example, most mutations at K152 shifted trait preference  
104 strongly towards invasion, whereas those at F157 caused more gradual effects (Fig. 2 – Suppl.  
105 4). Positions with extreme specificity scores clustered according to trait preference (Fig. 2E, blue  
106 and grey shading). Eliminating positive charges in region I, which may reduce the affinity of  
107 Ste12 for DNA, shifted trait preference towards invasion. We found little natural variation  
108 affecting charge in region I and II, but detected such variation outside of the mutagenized region  
109 (Fig. 2 – Suppl. 1). For example, the Ste12 DNA-binding domain of the invasive pathogen  
110 *Cryptococcus gattii* (12) contains two additional positive residues immediately C-terminal to  
111 region II (Fig. 2E). Introducing these *C. gattii*-specific residues (S177K, Q180R; denoted SKQR)  
112 into the *S. cerevisiae* Ste12 DNA-binding domain yielded a dominant invasion phenotype (Fig.  
113 2E), and decreased mating (Fig. 2 – Suppl. 5).

114  
115 Tec1 is thought to play an essential role in invasion by activating invasion genes, with Ste12  
116 either binding directly to DNA cooperatively with Tec1 or indirectly as part of a complex with  
117 Tec1 (9, 10). However, in contrast to both models, SKQR's invasive phenotype was independent  
118 of Tec1, as was the even stronger invasion phenotype due to the K150A variant (Fig. 2E). Thus,  
119 a single mutation in the Ste12 DNA-binding domain is sufficient to promote Tec1-independent  
120 invasion. This result argues that invasion genes contain sequence motifs that suffice to recruit  
121 Ste12 variants in the absence of the required cofactor Tec1. Because small changes within the  
122 Ste12 DNA binding domain shifted trait preference, we hypothesized that these changes allow  
123 Ste12 alone to occupy degenerate sites that would normally also require the binding of Tec1.

124  
125 To explore this hypothesis, we cloned two canonical mating pheromone response elements  
126 (PREs, TGAAAC), derived from *STE12*'s own regulatory sequence, upstream of a minimal  
127 *CYCI* promoter driving expression of firefly luciferase. Addition of the PREs to this reporter  
128 gene increased luciferase expression 5-fold in the presence of the wild-type Ste12, but only 2.5-  
129 fold in the presence of the hyper-invasive variant SKQR (Fig. 3A). The failure of SKQR to fully  
130 activate may be due to its decreased affinity or ability to dimerize. We designed a second  
131 reporter gene containing a fully symmetric binding site (PRE<sup>sym</sup>). Wild-type Ste12 activated the  
132 PRE<sup>sym</sup> reporter to a far greater extent than it did the PRE reporter; in contrast, the SKQR variant  
133 performed even worse with PRE<sup>sym</sup> than with PRE (Fig. 3A). These results demonstrate that  
134 Ste12 variants with opposing preferences for mating (*e.g.* wild-type) or invasion (*e.g.* SKQR)  
135 show differences in DNA-binding.

136  
137 To analyze the DNA-binding preferences of Ste12 variants in more detail, we tested the ability of  
138 a library of ~12,000 binding sites, with random bases in the last position of the core and in two

139 3' flanking positions of each PRE, to mediate Ste12-dependent transcription of a reporter gene  
140 needed for growth under selection conditions (Fig. 3B). We carried out a library selection with  
141 four Ste12 variants: wild-type; SKQR, which is mating-proficient and hyper-invasive; K149E,  
142 which eliminates mating but is neutral for invasion; and K152L, which eliminates mating and is  
143 hyper-invasive. Wild-type and K149E preferred two copies of the canonical TGAAAC(A) to  
144 activate the reporter. In contrast, SKQR had a weaker preference for C in the last core position,  
145 while K152L showed a weak preference for A over C at this position (Fig. 3C); these two  
146 variants showed no preference at the first 3' flanking base (Fig. 3C). To determine the extent of  
147 Ste12-dependent activation due to these binding preferences, we grouped all sequences from the  
148 library containing either C or A in the last core position. Wild-type Ste12 and the mating-  
149 deficient K149E variant activated expression similarly from a dimeric TGAAAC, as is found in  
150 many genes required for mating (Fig. 3D, left). This surprising result indicates that the ability of  
151 Ste12 to bind to and drive expression on a binding site with two canonical PREs does not suffice  
152 for mating; rather, K149E may affect the interaction of Ste12 with a cofactor. In contrast, the  
153 hyper-invasive variants SKQR and K152L showed greatly decreased or no activation,  
154 respectively, at binding sites with canonical PREs (Fig. 3D, left), but they activated expression at  
155 sites with two copies of TGAAAA (Fig. 3D, right). Thus, the mechanism by which Ste12  
156 variants increase invasion at the cost of mating may be their change in DNA-binding specificity  
157 to include TGAAAA motifs. We analyzed previous Ste12 chromatin immunoprecipitation data  
158 (9) and found a reduced preference for a C at core position 6 in genes bound during invasion  
159 relative to those bound during mating (Fig. 3 – Suppl. 2). Furthermore, invasion genes bound by  
160 Ste12 but not Tec1 show a similar decreased preference for C and a slight preference for A at  
161 this position (Fig. 3 – Suppl. 2). These data support the idea that in wild-type cells, Ste12 may  
162 adopt alternative binding modes, favoring binding sites that do not contain the canonical C found  
163 in the PRE.

164  
165 Fungal pathogens like *Cryptococcus neoformans* transition toward an invasive lifestyle upon  
166 sensing the increased body temperature of their animal hosts (13). Having established that trait  
167 preference in *S. cerevisiae* can be modulated by genetic changes in Ste12, we asked whether  
168 temperature affected specificity toward mating and invasion. Furthermore, since chaperones  
169 maintain protein function at increased temperatures and modulate pheromone signaling in *S.*  
170 *cerevisiae* (2), we also asked whether mating or invasion changed in the presence of radicicol, a  
171 pharmacological inhibitor of Hsp90. Although the MAPK pathway contains the Hsp90 client  
172 Ste11, Ste12 is not a known client of this chaperone (14). We confirmed that mating is  
173 modulated by temperature and by Hsp90 function by mating cells expressing wild-type Ste12 in  
174 the presence of radicicol, or at increased temperature (Fig. 4A). We then subjected the Ste12  
175 variant library to mating selection at 37°C or with Hsp90 inhibited. Most Ste12 variants  
176 responded to increased temperature or Hsp90 inhibition as wild-type Ste12 did (Fig. 4 – Suppl.  
177 1). However, there were two positions, K150 and K152, in which mutations were highly  
178 temperature-responsive and Hsp90-dependent (Fig. 4B). This pair of lysines resides within the  
179 mutagenized segment that modulates mating and invasion specificity. We validated the  
180 temperature and Hsp90 effect on a variant (K150I) that mates near wild-type levels in the  
181 absence of heat or radicicol treatment (Fig. 4C). However, cells with the K150I variant under  
182 either treatment were severely decreased in mating. Thus, while Ste12 variants that are Hsp90-  
183 dependent are rare, they are accessible through a single amino acid change, suggesting that the  
184 chaperone could facilitate a mutational path toward the pathogenic lifestyle by minimizing

185 mating costs at 30°C and enhancing invasion at 37°C. Because K150 resides in the segment of  
186 the DNA-binding domain that modulates trait preference, we expected that invasion at high  
187 temperature would increase for variants at this position. We therefore conducted selection for  
188 invasion at 37°C. Indeed, the mean effect of all variants at K150 was to increase invasion at high  
189 temperature with a concomitant decrease in mating (Fig. 4D, 4E), demonstrating that K150  
190 variants were not simply unstable at high temperature. Thus, mutations in Ste12 can interact with  
191 an environmental factor to further bias cellular decision-making toward invasion over mating.

192

## 193 **Discussion**

194 In summary, we carried out mutational scans for two independent traits to reveal specificity  
195 mediated through the DNA-binding domain of an ancient, fungal-specific transcription factor.  
196 This DNA-binding domain shows similarity to a homeodomain, but rather than a typical  
197 homeodomain recognition helix, it has a larger region predicted to contain two helices  
198 interrupted by a loop centered around the conserved W156 (15). The arrangement of mating- and  
199 invasion-preferring mutations on either side of the apparent recognition helix suggests that this  
200 DNA-binding domain offers flexibility to accommodate alternative binding modes to shift trait  
201 preference. The potential for mutations to generate alternative DNA-binding modes is supported  
202 by a recent study using protein binding microarrays to evaluate the specificity of disease-  
203 associated transcription factor variants (16, 17). Rare coding variation in the homeodomain  
204 recognition helices of several transcription factors alters DNA binding specificity, which likely  
205 contributes to associated diseases in humans. Strikingly, some homeodomain variants bind at  
206 sites that differ only subtly from the wildtype, yet this promiscuity is associated with specific  
207 diseases (17). In other cases, the binding preferences of homeodomain and other transcription  
208 factors become subtly altered through formation of transcription factor pairs (18).

209

210 We demonstrate here that Ste12 can explore alternative binding modes through mutation, and  
211 thereby shift trait preference. However, throughout fungal evolution, the DNA-binding domain  
212 remains largely invariant, reinforcing the idea that the protein more typically takes advantage of  
213 both multiple interacting partners that have been gained and lost over time (19) as well as  
214 environmental conditions such as temperature to influence decision-making. Two of the most  
215 widespread fungal pathogens, *Candida albicans* and *Cryptococcus neoformans*, have adopted  
216 lifestyles that favor invasion of host tissues at the cost of mating (20, 21). This tradeoff can be  
217 modulated by environmental conditions that mimic the body temperature of the host, with  
218 invasion favored when the pathogen shifts from 30°C to 37°C (13, 22). That mutations affect  
219 trait preference as well as environmental sensitivity suggests that Ste12 may play a role in  
220 allowing fungi to rapidly adopt a pathogenic lifestyle.

221

222 Another common mechanism to generate trait specificity is gene duplication followed by  
223 subfunctionalization (23, 24). Ste12 is very rarely duplicated in fungal genomes, which is  
224 consistent with our finding that hyper-invasive Ste12 variants are dominant over wildtype. Thus,  
225 we suggest that Ste12's atypical homeodomain reflects a requirement to accommodate both  
226 mating and invasion under the control of a single factor.

227

228

229

230

## 231 **Materials and Methods**

232

233 **Generation of *STE12* mutant libraries.** The *STE12* locus from *Saccharomyces cerevisiae* strain  
234 BY4741, including the intergenic regions, was introduced into the yeast vector pRS415  
235 containing a *LEU2* marker (25). Degenerate DNA sequence encoding a 33 amino acid (99bp)  
236 segment of Ste12's DNA binding domain was generated by 2.5% doped oligonucleotide  
237 synthesis (Trilink Biotechnologies, San Diego, CA). Invariant 30bp sequences were designed on  
238 either side of the mutagenized fragment; these flanking sequences contained NotI and ApaI cut  
239 sites found in the coding sequence of *STE12*, and were unique in the *STE12* plasmid construct.  
240 Both fragment and plasmid were double-digested with NotI and ApaI, and the plasmid library  
241 was assembled by standard ligation. *STE12* libraries were transformed into electrocompetent *E.*  
242 *coli* (ElectroMAX DH10B, Invitrogen), and amplified overnight in selective media. Efficiency of  
243 ligation was verified by Sanger sequencing across the mutagenized region of 96 transformants  
244 (26); no assembly errors were detected, and mutant proportions reflected those expected for  
245 doped oligo synthesis at 2.5%. Plasmid libraries were used to transform yeast (BY4741 MAT $\alpha$  or  
246  $\Sigma$ 1278b- $\alpha$ ) with a deleted endogenous copy of *STE12* by high-efficiency lithium acetate  
247 transformation (27). The same plasmid library was used to transform yeast ( $\Sigma$ 1278b- $\alpha$ ) for  
248 invasion selection. Individual point mutations were generated in wild-type *STE12* plasmids by  
249 site-directed mutagenesis (Q5, New England Biolabs).

250

251 **Large-scale trait selections.** The BY4742 MAT $\alpha$  strain was used as the mating partner for the  
252 library-transformed BY4741 MAT $\alpha$  in all selections and mating assays. Transformed yeast cells  
253 were grown to late log-phase in a single 500mL culture, and cells were harvested to determine  
254 plasmid variant frequencies in the input population. The same culture was used to seed 36  
255 independent mating selections for each treatment: one million MAT $\alpha$  cells with *STE12* variants  
256 were mixed with 10-fold excess wild-type MAT $\alpha$  cells and allowed 5 hours to mate(28).  
257 Depending on treatment type, cell mixtures were left at 30C with DMSO, 30°C with the Hsp90  
258 inhibitor radicicol, or 37°C with DMSO. A 5uM concentration of the Hsp90 inhibitor radicicol  
259 (Sigma-Aldrich, R2146) was chosen due to its measureable effect on mating efficiency and lack  
260 of pleiotropic growth defects. Radicicol was chosen over the Hsp90 inhibitor geldanamycin  
261 (Sigma-Aldrich, G3381), because five-fold higher concentrations of geldanamycin were required  
262 to achieve the same phenotypic effect as with radicicol (data not shown). The temperature of  
263 37°C was chosen for the similarity of effects on mating between temperature and radicicol  
264 treatments. After mating was completed, cell mixtures were plated using auxotrophic markers  
265 present only in mated diploids. Plasmids containing *STE12* variants were extracted from this  
266 output population, as well as from the pre-mating input, for subsequent deep sequencing. Mating  
267 selections were repeated in triplicate. For invasion,  $\Sigma$ 1278b- $\alpha$  yeast cells transformed with the  
268 Ste12 plasmid library were grown to late log-phase in a single 500mL culture, diluted (10,000  
269 cells per plate), and plated onto 40 plates of synthetic complete medium lacking leucine (2%  
270 agar). Plates were incubated at 30°C or 37°C for 72 hours to allow for sufficient invasion, as  
271 previously described (29). After three days, cells were washed from the plate surfaces, enriching  
272 for cells embedded in the agar. Agar pucks were removed from plates with a razor. Using the  
273 “salsa” blender setting (Hamilton Beach, Glen Allen, VA), a coarse slurry was generated and  
274 subsequently poured over a vacuum apparatus lined with cheesecloth. The resulting liquid cell  
275 suspension was spun down at 5000rpm to collect cells for subsequent deep sequencing.  
276 Individual invasion assays (as in Fig. 2F) were treated identically, but 10uL aliquots of OD-

277 normalized cultures were plated to image colonies for each strain. For high osmolarity growth,  
278 selections were conducted using the BY4741 MATa library-transformed population grown  
279 overnight in media containing 1.5M Sorbitol, as described previously (30). Populations were  
280 sequenced before and after growth to determine enrichment scores that defined the 95%  
281 confidence interval used in Fig. 1D. For all trait selections, we chose sample sizes that were at  
282 least 10-fold higher than the variant library size, ensuring that each variant would be adequately  
283 sampled in each of the three biological replicate selections.

284  
285 **Sequencing and determination of trait scores.** Sequencing was completed on Illumina's  
286 MiSeq or NextSeq platforms. Sequencing libraries were prepared by extracting plasmids from  
287 yeast populations (Yeast Plasmid Miniprep II, Zymo Research, Irvine, CA) before and after  
288 selection. These plasmids were used as template for PCR amplification that added adaptor  
289 sequences and 8bp sample indexes to the 99bp mutagenized region for sequencing (all libraries  
290 amplified < 15 cycles). Paired-end reads spanning the mutagenized region were filtered to obtain  
291 a median of 5 million reads per sample. Using ENRICH software (31), read counts for each  
292 variant before and after selection were used to determine mating efficiency and invasion ability  
293 of *STE12* variants. Briefly, counts for a particular variant in the input and output libraries were  
294 normalized by their respective read totals to determine frequency in each, and a ratio of the  
295 output and input frequencies determine a variant's functional score. Finally, enrichment scores  
296 are normalized by the enrichment of wild-type *Ste12* in each selection. Treatment scores are  
297 calculated identically, and in all cases where difference scores are shown, the score represents  
298  $\log_2(\text{treated}) - \log_2(\text{untreated})$ .

299  
300 **Calculating intramolecular epistasis scores.** Intramolecular epistasis scores were defined as  
301 the deviation of double-mutant's functional score ( $W_{ij}$ ) from the multiplied scores of its  
302 constituent single-mutants ( $w_i * w_j$ ). A negative epistasis score indicates that the deleterious effect  
303 of one mutation is increased by the presence of the partner mutation, while a positive epistasis  
304 score indicates that the partner mutation decreases the deleterious effects of individual  
305 mutations(32).

306  
307 **Quantitative mating assay.** Individual variants tested for mating efficiency were treated  
308 identically to the large-scale mating selection experiments, except genotypes were scored  
309 individually on selective plates for either mated diploids (2N) or both diploids and unmated  
310 MATa haploids (2N, 1N). The proportion of mated individuals (mating efficiency) is taken as the  
311 ratio of colony counts on diploid to counts on diploid + haploid plates (2N/2N1N). *Ste12*  
312 variants were always tested alongside wild-type to determine relative changes in response to  
313 treatment.

314  
315 **STE12 variant RNA-seq.** RNA was extracted from yeast cells harboring the *STE12* mutant  
316 library grown under non selective conditions using acid phenol extraction as previously  
317 described(33). *STE12*-specific cDNA was created using a gene-specific cDNA primer and  
318 Superscript III (Life Technologies). cDNA was amplified in a manner similar to the plasmids,  
319 and prepared for sequencing using Illumina Nextseq.

320  
321 **Luciferase assays.** BY4741 MATa *ste12*Δ yeast cells were transformed with two plasmids: one  
322 containing the *STE12* gene and one containing a reporter upstream of the firefly luciferase gene.

323 The promoter for the reporter contained two divergent PREs, derived from *STE12*'s own  
324 promoter, that are separated by three adenines, upstream of a minimal *CYCI* promoter. Although  
325 Ste12 does bind single PREs as a monomer, two sites are needed for signal detection in reporter  
326 assays (34). Yeast cells harboring both plasmids were grown overnight, back-diluted to identical  
327 optical density, and allowed 2-3 doublings before luciferase measurement. Luciferase activity  
328 was measured on a Biotek Synergy H1 plate reader immediately after addition of luciferin.

329  
330 **Large-scale analysis of Ste12 binding sites.** A *HIS3* reporter gene was used for testing large  
331 populations of binding site variants (Fig. 3B) in media lacking histidine. We designed  
332 oligonucleotides that maintain the central portion of the native PRE, but randomized six  
333 surrounding bases on either side (NNNNNNTTTCAAAATGAAANNNNNN). This library was  
334 cloned into a promoter from the same plasmid used in the luciferase assay, at the same position  
335 as the native PRE. Strains containing one of four Ste12 protein variants were transformed with  
336 the same binding site library reporter population, and grown overnight in synthetic media lacking  
337 histidine with 10mM of the His3 competitive inhibitor 3-amino-triazole. Three biological  
338 replicate selections were conducted for each Ste12 protein variant tested against the binding site  
339 library. Cells were collected and sequenced before and after selections to determine enrichment  
340 scores for each binding site variant. Computational analysis of binding site enrichment scores  
341 was identical to pipeline for STE12 protein variants. Enrichment of all binding site variants are  
342 shown relative to the enrichments of empty plasmids, which were spiked-in to the binding site  
343 library as control. The 250 binding sites with the highest enrichments were grouped and  
344 Weblogo (35) was used to generate base preference plots.

345  
346 **Evolutionary analysis of Ste12 DNA-binding domain among fungi.** Using fungal genomes  
347 deposited into NCBI and from the fungal sequencing project at Joint Genome Institute, we  
348 created a BLAST database of translated coding sequences and queried with the *S. cerevisiae*  
349 Ste12 protein sequence. Full protein sequences from BLAST hits were aligned using MUSCLE  
350 (36) and used to determine conservation at each site in the mutated segment. The secondary  
351 structure of *S. cerevisiae*'s Ste12 DNA-binding domain was determined using Psipred (37).

352  
353 **Analysis of Ste12 ChIP data.** Genes bound by Ste12 only in mating conditions were compared  
354 to those bound by Ste12 only in invasion conditions (9). FIMO(38) was used to extract all  
355 matches to the Ste12 binding site in each of these gene sets. The frequency of the each possible  
356 base at position 6 of the core STE12 motif was determined relative to the genomic background  
357 (STE12 binding sites in all upstream sequences, no separation by mating or invasion gene  
358 function). The core 6 base frequencies relative to genomic background was then compared for  
359 genes bound in mating or invasion conditions. We used the same method to look at core 6 base  
360 frequencies at genes bound by both Ste12 and Tec1 or those bound by Ste12 alone during  
361 invasion.

362  
363  
364 **References:**

- 365 1. A. Mody, J. Weiner, S. Ramanathan, Modularity of MAP kinases allows deformation of  
366 their signalling pathways. **11** (2009), doi:10.1038/ncb1856.  
367 2. J. F. Louvion, T. Abbas-Terki, D. Picard, Hsp90 is required for pheromone signaling in  
368 yeast. *Mol. Biol. Cell.* **9**, 3071–83 (1998).



- 369 3. J. G. Zalatan, S. M. Coyle, S. Rajan, S. S. Sidhu, W. a Lim, Conformational control of the  
370 Ste5 scaffold protein insulates against MAP kinase misactivation. *Science*. **337**, 1218–22  
371 (2012).
- 372 4. J. G. Cook, L. Bardwell, J. Thorner, Inhibitory and activating functions for MAPK Kss1  
373 in the *S. cerevisiae* filamentous-growth signalling pathway. *Nature*. **390**, 85–88 (1997).
- 374 5. J. W. Dolan, C. Kirkman, S. Fields, The yeast STE12 protein binds to the DNA sequence  
375 mediating pheromone induction. *Proc. Natl. Acad. Sci. U. S. A.* **86**, 5703–7 (1989).
- 376 6. B. Errede, G. Ammerer, STE12, a protein involved in cell-type-specific transcription and  
377 signal transduction in yeast, is part of protein-DNA complexes. *Genes Dev.* **3**, 1349–1361  
378 (1989).
- 379 7. Y. L. O. Yuan, I. L. Stroke, S. Fields, Coupling of cell identity to signal response in yeast:  
380 Interaction between the alpha and STE12 proteins. *Genes Dev.* **7**, 1584–1597 (1993).
- 381 8. H. D. Madhani, G. R. Fink, The control of filamentous differentiation and virulence in  
382 fungi. **8924**, 348–353 (1998).
- 383 9. J. Zeitlinger *et al.*, Program-Specific Distribution of a Transcription Factor Dependent on  
384 Partner Transcription Factor and MAPK Signaling. **113**, 395–404 (2003).
- 385 10. S. Chou, S. Lane, H. Liu, Regulation of Mating and Filamentation Genes by Two Distinct  
386 Ste12 Complexes in *Saccharomyces cerevisiae* †. **26**, 4794–4805 (2006).
- 387 11. O. Shoval, Evolutionary Trade-Offs, Pareto Optimality, and the Geometry of Phenotype  
388 Space. *Science (80-. )*. **1157** (2012), doi:10.1126/science.1217405.
- 389 12. J. A. Fraser *et al.*, Same-sex mating and the origin of the Vancouver Island *Cryptococcus*  
390 *gattii* outbreak. *Nature*. **437**, 1360–1364 (2005).
- 391 13. J. R. Perfect, *Cryptococcus neoformans* : the yeast that likes it hot (2006),  
392 doi:10.1111/j.1567-1364.2006.00051.x.
- 393 14. R. Zhao *et al.*, Navigating the chaperone network: an integrative map of physical and  
394 genetic interactions mediated by the hsp90 chaperone. *Cell*. **120**, 715–27 (2005).
- 395 15. Y. L. Yuan, S. Fields, Properties of the DNA-binding domain of the *Saccharomyces*  
396 *cerevisiae* STE12 protein. *Mol. Cell. Biol.* **11**, 5910–8 (1991).
- 397 16. A. N. McKeown *et al.*, Evolution of DNA specificity in a transcription factor family  
398 produced a new gene regulatory module. *Cell*. **159**, 58–68 (2014).
- 399 17. L. A. Barrera *et al.*, Survey of variation in human transcription factors reveals prevalent  
400 DNA binding changes. *Science (80-. )*. **351**, 1450–1454 (2016).
- 401 18. A. Jolma *et al.*, DNA-dependent formation of transcription factor pairs alters their binding  
402 specificity. *Nature*. **527**, 384–388 (2015).
- 403 19. T. R. Sorrells, L. N. Booth, B. B. Tuch, A. D. Johnson, Intersecting transcription networks  
404 constrain gene regulatory evolution. *Nature*. **523**, 361–365 (2015).
- 405 20. a Johnson, The biology of mating in *Candida albicans*. *Nat.Rev.Microbiol.* **1**, 106–116  
406 (2003).
- 407 21. H. Dong, W. Courchesne, A novel quantitative mating assay for the fungal pathogen  
408 *Cryptococcus neoformans* provides insight into signalling pathways responding to  
409 nutrients and temperature. *Microbiology*. **144 ( Pt 6)**, 1691–7 (1998).
- 410 22. R. S. Shapiro, L. E. Cowen, Thermal Control of Microbial Development and Virulence :  
411 Molecular Mechanisms of Microbial Temperature Sensing. **3**, 1–6 (2012).
- 412 23. J. T. Bridgham, S. M. Carroll, J. W. Thornton, Evolution of hormone-receptor complexity  
413 by molecular exploitation. *Science*. **312**, 97–101 (2006).
- 414 24. M. Lynch, J. S. Conery, The evolutionary fate and consequences of duplicate genes.

- 415 *Science*. **290**, 1151–5 (2000).
- 416 25. D. Mumberg, R. Müller, M. Funk, Yeast vectors for the controlled expression of  
417 heterologous proteins in different genetic backgrounds. *Gene*. **156**, 119–22 (1995).
- 418 26. F. Sanger, S. Nicklen, a R. Coulson, DNA sequencing with chain-terminating inhibitors.  
419 *Proc. Natl. Acad. Sci. U. S. A.* **74**, 5463–7 (1977).
- 420 27. R. D. Gietz, R. a Woods, Transformation of yeast by lithium acetate/single-stranded  
421 carrier DNA/polyethylene glycol method. *Methods Enzymol.* **350**, 87–96 (2002).
- 422 28. J.-Y. Leu, A. W. Murray, Experimental evolution of mating discrimination in budding  
423 yeast. *Curr. Biol.* **16**, 280–6 (2006).
- 424 29. O. Ryan *et al.*, Global gene deletion analysis exploring yeast filamentous growth. *Science*.  
425 **337**, 1353–6 (2012).
- 426 30. F. Posas, E. a Witten, H. Saito, Requirement of STE50 for osmostress-induced activation  
427 of the STE11 mitogen-activated protein kinase kinase kinase in the high-osmolarity  
428 glycerol response pathway. *Mol. Cell. Biol.* **18**, 5788–5796 (1998).
- 429 31. A. F. Rubin *et al.*, Enrich2 : a statistical framework for analyzing deep mutational  
430 scanning data (2016).
- 431 32. C. L. Araya *et al.*, A fundamental protein property, thermodynamic stability, revealed  
432 solely from large-scale measurements of protein function. *Proc. Natl. Acad. Sci. U. S. A.*  
433 **109**, 16858–63 (2012).
- 434 33. J. T. Cuperus, R. S. Lo, L. Shumaker, J. Proctor, S. Fields, A tetO Toolkit To Alter  
435 Expression of Genes in *Saccharomyces cerevisiae* (2015), doi:10.1021/sb500363y.
- 436 34. T. Su, E. Tamarkina, I. Sadowski, Organizational constraints on Ste12 cis -elements for a  
437 pheromone response in *Saccharomyces cerevisiae*. **277**, 3235–3248 (2010).
- 438 35. G. Crooks, G. Hon, J. Chandonia, S. Brenner, NCBI GenBank FTP Site\nWebLogo: a  
439 sequence logo generator. *Genome Res.* **14**, 1188–1190 (2004).
- 440 36. R. C. Edgar, MUSCLE: Multiple sequence alignment with high accuracy and high  
441 throughput. *Nucleic Acids Res.* **32**, 1792–1797 (2004).
- 442 37. L. J. Mcguffin, K. Bryson, D. T. Jones, The PSIPRED protein structure prediction server.  
443 **16**, 404–405 (2000).
- 444 38. C. E. Grant, T. L. Bailey, W. S. Noble, FIMO : scanning for occurrences of a given motif.  
445 **27**, 1017–1018 (2011).

446  
447 **Acknowledgments:** We thank J. Thomas for advice on analysis of fungal variation. We thank D.  
448 Fowler and H. Malik for comments on the manuscript. The work was supported by NIH grant  
449 R01GM114166 to C.Q. and S.F. M.W.D. was supported by an NSF Graduate Research  
450 Fellowship and a WRF-Hall fellowship. S.F. is an investigator of the Howard Hughes Medical  
451 Institute, which supported J.T.C.

452  
453 **Author Contributions:** M.W.D., J.T.C., S.F., and C.Q. conceived and interpreted experiments.  
454 M.W.D., S.F., and C.Q. wrote the manuscript, J.T.C. and J.A.C. provided comments. M.W.D.  
455 conducted experiments and data analysis; J.A.C. contributed to high-throughput binding assay.

456  
457 **Data Availability.** High-throughput sequencing reads have been submitted to NCBI SRA,  
458 awaiting accession number. Datasets with calculated enrichment scores for each tested variant in  
459 each condition, along with positional mean scores, and scores from binding site library selections  
460 are provided in source data files.

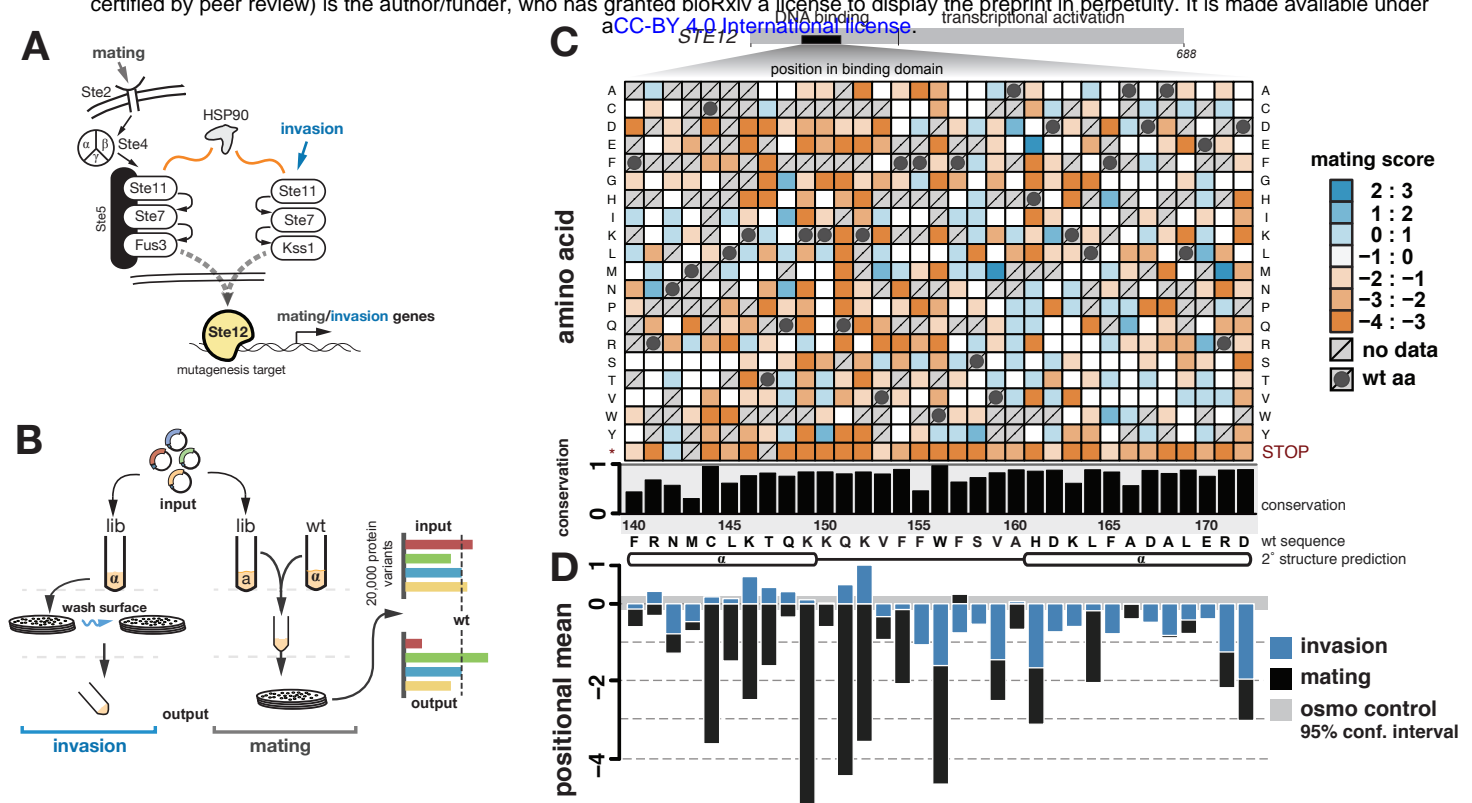

**Fig. 1. Deep mutational scanning determines Ste12 DNA-binding domain function for both mating and invasion.** (A) The yeast mating and invasion pathways contain shared signaling components, and both depend on Ste12 for activation of distinct regulatory programs. (B) Two yeast populations were transformed with the same STE12 variant library. For assaying invasion, SIGMA1278b MAT $\alpha$  cells ( $n = 400,000$  per replicate, 3 biological replicates) were plated on selective media, and grown. Selection was performed by washing colonies from plate surfaces and collecting cells embedded in the agar for sequencing. For assaying mating, BY4741 MAT $\alpha$  ste12 $\Delta$  cells were mated to MAT $\alpha$  cells, and diploids ( $n = 500,000$  per replicate, 3 biological replicates) were selected, scraped from the agar, and sequenced. In both cases, input variant frequencies were defined prior to selection. (C) The effects of single amino-acid substitutions within Ste12's DNA-binding domain on mating ability are shown. On the x-axis, the wild-type Ste12 sequence is shown, along with its predicted secondary structure (helices shown as tubes) and conservation. Conservation was determined as fraction of identity among 985 fungal species (Fig. S4). On the y-axis, amino acid substitutions are shown. Variants increasing mating efficiency are in shades of blue, and variants decreasing mating efficiency are in shades of orange based on log<sub>2</sub> enrichment scores relative to wild-type. Dark grey circles indicate the wild-type Ste12 residue, and crosses indicate missing data. Ste12 variants showed comparable expression levels (Fig. 1 - Suppl. 4). (D) Positional mean scores for single amino acid substitutions are shown for mating (black) and invasion (blue), excluding stop codons. Grey horizontal bar indicates confidence interval for experimental noise determined from selection for Ste12-independent high osmolarity growth.

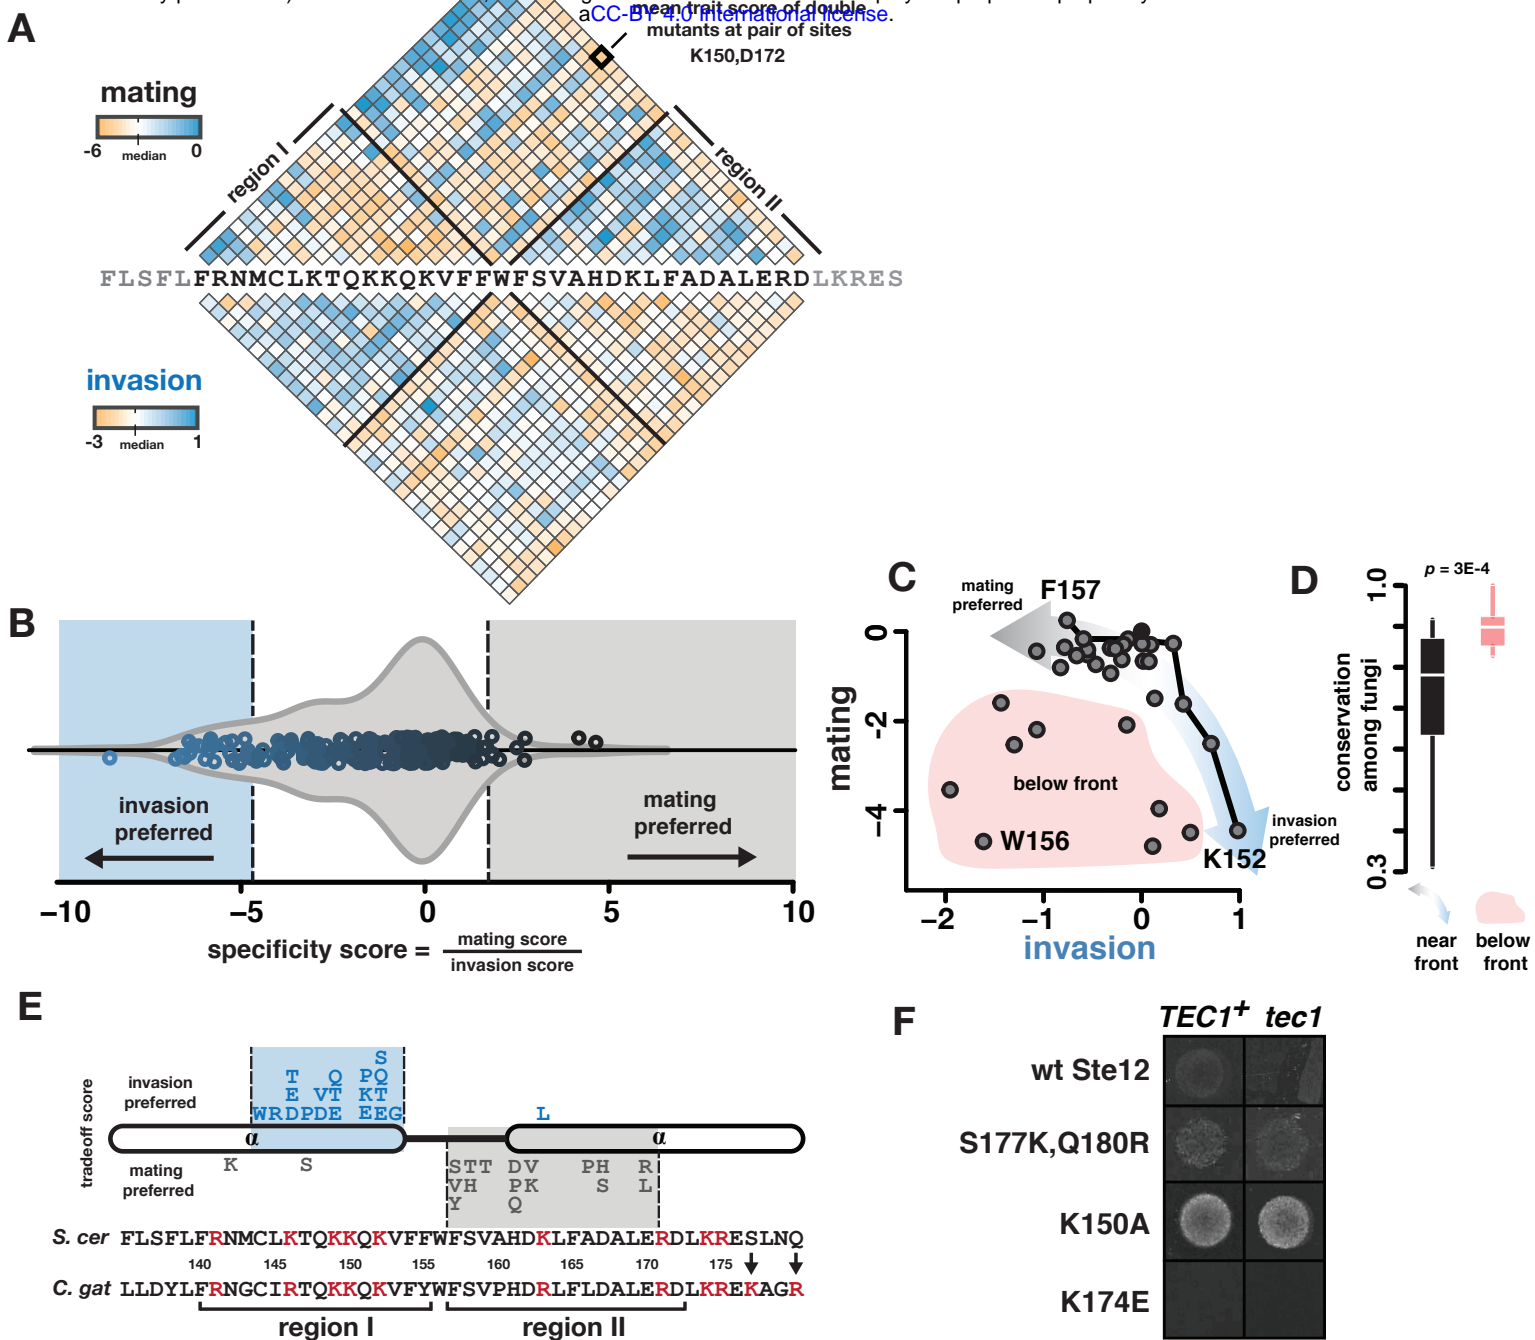

**Fig. 2. Mutations in the Ste12 DNA-binding domain shift trait preference between mating and invasion.** (A) Mean effect of double mutations between all combinations of positions for mating (above wild-type sequence) and invasion (below wild-type sequence). A specific pair of positions is shown in bold. Effects are color-coded as in Figure 1. Black lines emanating from W156 represent boundaries of region I, in which mutations primarily reduced mating, and region II, in which mutations primarily reduced invasion. (B) Along the x-axis, the specificity score for each mutation (circles) is superimposed on the full distribution (grey violin plot). The score is calculated as the  $\log_2$  of the ratio of a mutation's effect on mating divided by its effect on invasion. *S. cerevisiae* Ste12 has a preference for mating: the largest density of mutations in the distribution have a negative specificity score, indicating that they increase invasion at the cost of mating (blue), while few mutations increase mating at the cost of invasion (black). Shaded boxes indicate mutations with the most extreme preferences ( $>2$  standard deviations) for each trait. (C) Scatterplot of positional mean scores for both mating and invasion showed inverse relationship, indicating a tradeoff between both traits. The tradeoff is visualized as a Pareto front (black line), which was determined empirically; positions near the front maintain high values for one trait and minimize costs to the other. Arrows indicate preference for either mating (grey) or invasion (blue). Positions near the front were distinguished from those below the front (shaded in red) by calculating Euclidian distances. (D) Boxplots show conservation for positions near and below the front; positions below the front are more significantly more conserved among fungi than those near the front (two-sided t-test). (E) Single mutations from shaded boxes in B are mapped onto the predicted secondary structure of Ste12. Nearly every mutation that increased invasion at the cost of mating (blue) mapped to the first predicted helix, while most mutations that increased the preference for mating (black) mapped to the central loop and second predicted helix. *S. cerevisiae* and *C. gattii* sequences for this region are shown below, with positively charged residues in red. Arrows point to two additional positively charged residues found in *C. gattii* at the C-terminus of the region II helix that were used in the SKQR mutant. (F) Wild-type Ste12 requires the heterodimeric partner Tec1 for invasion, as a *tec1* $\Delta$  strain fails to invade. The region I mutation K150A led to invasion without Tec1. Introduction of the two positively charged residues found in *C. gattii* (SKQR) led to the same Tec1-independent phenotype, whereas introduction of a negative charge (K174E) eliminated invasion. Hyper-invasive mutants showed a dominant phenotype, as these mutants were tested in the presence of wild-type Ste12.



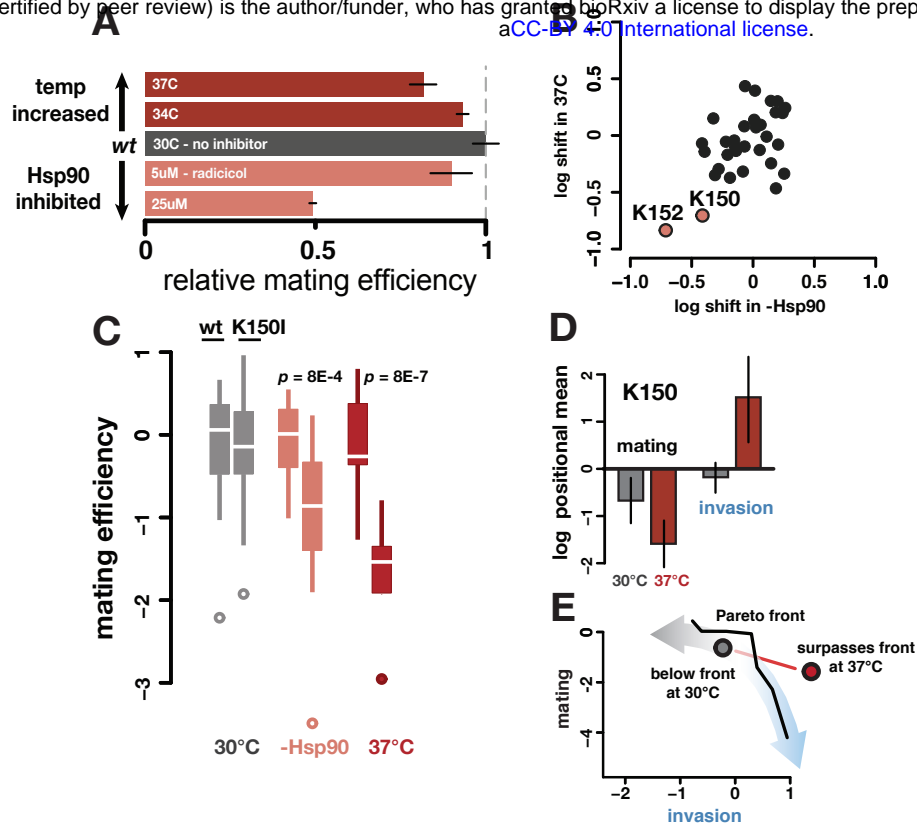

**Fig. 4. Mutations in Ste12's DNA-binding domain enhance temperature-dependent modulation of trait preference.** (A) Mating with wild type Ste12 at increased temperature (dark red) or in the presence of Hsp90 inhibitor radicicol (pale red) is reduced relative to an untreated control (black), error bars represent standard error of the mean (s.e.m). (B) The mating efficiency of Ste12 variants at high temperature or with Hsp90 inhibition is shown as the shift in mean effect at each mutated position. Two positions, K150 and K152 (pale red), showed greatest sensitivity to both treatments. (C) K150I was tested in a quantitative assay to validate its temperature-sensitive and Hsp90-dependent mating activity, shown relative to wild-type (left boxplot in each pair) in each treatment (n = 20 for each sample). (D) Ste12 variants at K150 (mean effect) decreased mating (left panel) and invasion (right panel) at standard temperature (grey bars). At high temperature (red bars), mating further decreased; however, invasion increased. Error bars represent s.e.m. The same data, represented as a scatterplot (E), show that K150, at high temperature, surpasses the Pareto front (Fig. 2C), increasing invasion at 37°C with little cost to mating at 30°C.

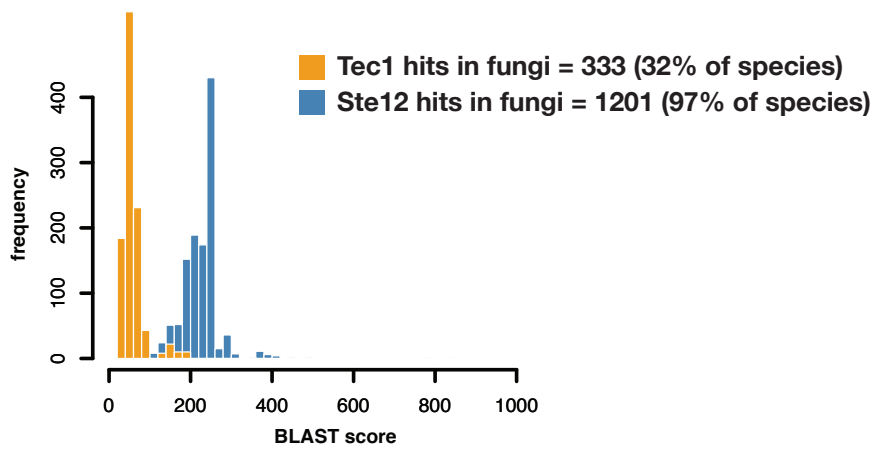

**Fig. 1 - Suppl Fig 1. Tec1 is frequently lost in fungi whereas Ste12 is maintained.** BLAST queries of 985 fungal genomes identified matches to either *S. cerevisiae* Tec1 (orange) or Ste12 (blue) protein sequence. Using a confidence threshold of BLAST score > 60, many fewer matches were found for Tec1, while most species maintained Ste12.

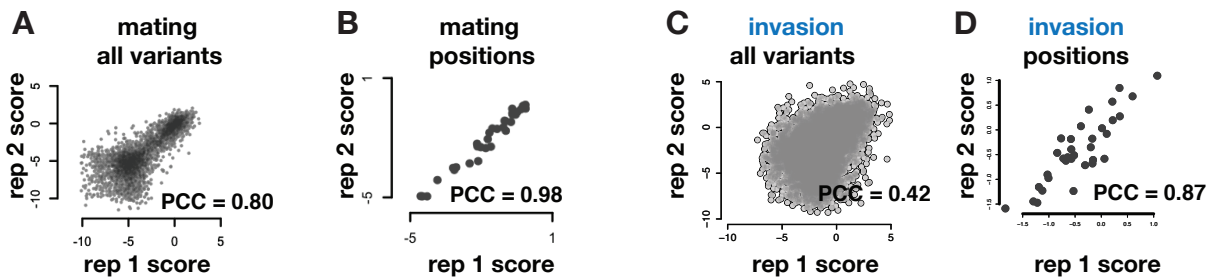

**Fig. 1 - Suppl Fig 2. Mating and invasion enrichment scores are reproducible across replicate experiments.** Selections for each trait were done in three biological replicates. We computed Pearson correlation coefficients (PCC) between replicates for all variants (A,C), as well as positional means (B, D). Shown are correlations for replicate 1 and 2, results were similar for other replicate pairs. Invasion selections were less well correlated. Nevertheless, positional mean scores were strongly correlated for both traits across replicates.

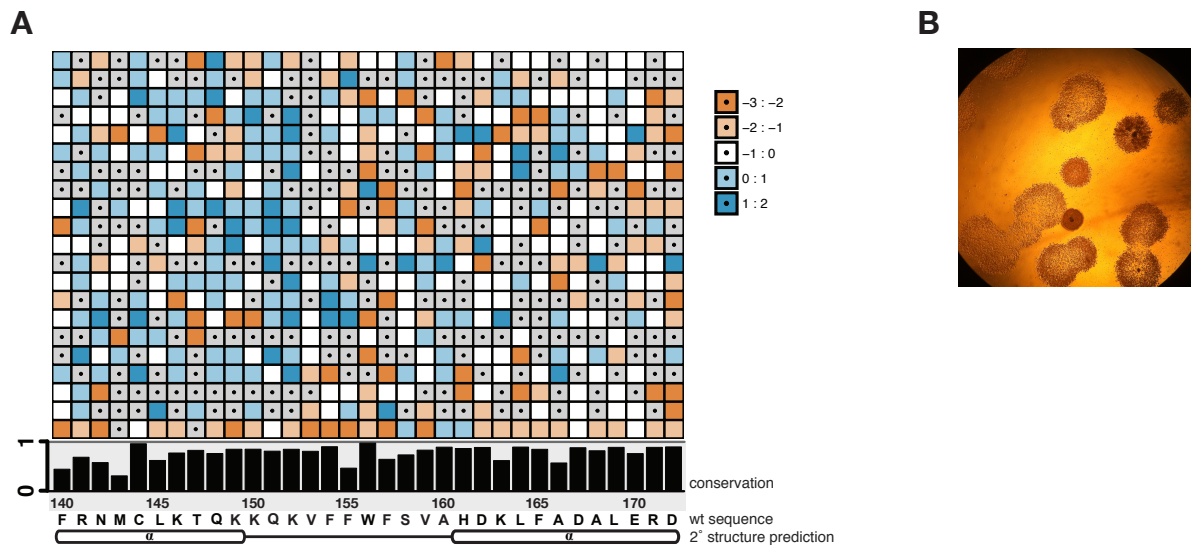

**Fig. 1 - Suppl Fig 3. Variation in the highly conserved DNA binding domain of Ste12 generates a range of invasion phenotypes.** (A) A heatmap of invasion scores for all single mutants is displayed as in Fig. 1C for mating scores. (B) A 10x magnified image of a washed plate containing invaded colonies with different Ste12 variants shows variation in the invasion phenotype.

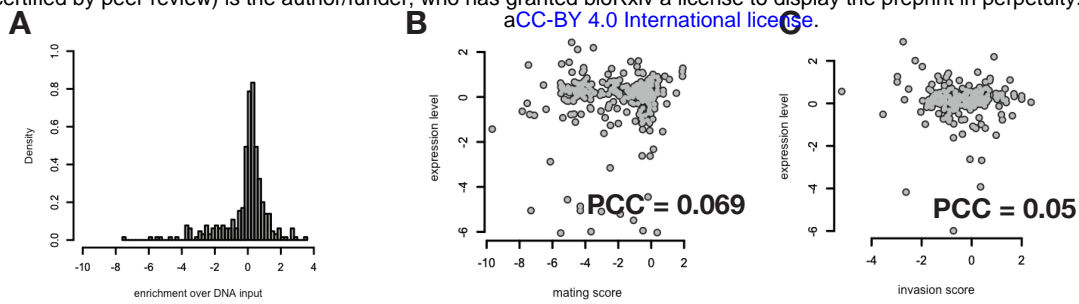

**Fig. 1 - Suppl. 4. Variant expression shows little variation and no correlation with phenotypic effects.** (A) The distribution of  $\log_2$  enrichment of transcripts relative to plasmid counts for each Ste12 variant rarely deviates from zero, indicating low variation in expression level among variants. Each variant's expression level is plotted against each variant's trait enrichment score, for (B) mating and (C) invasion, demonstrating that variant expression levels did not affect phenotype.

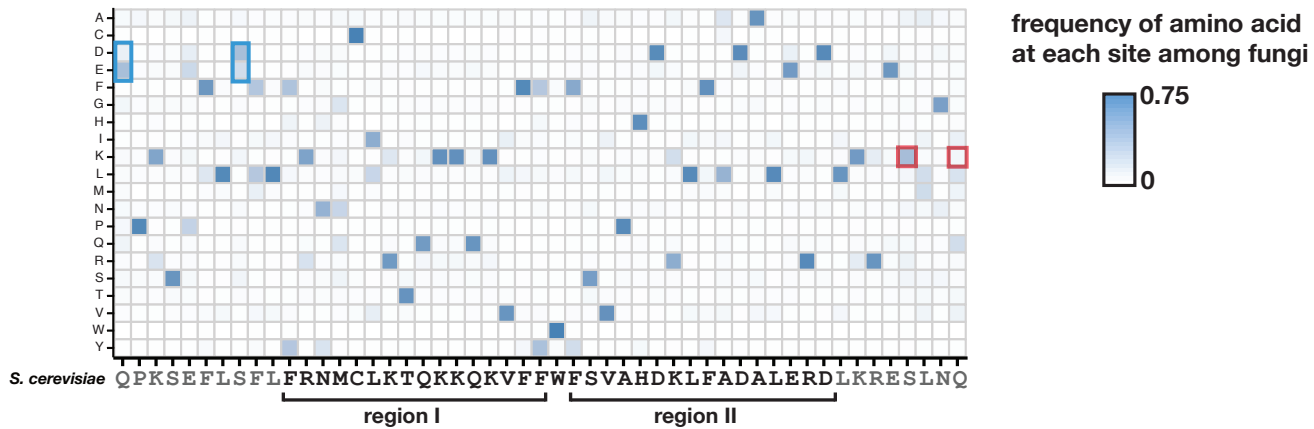

**Fig. 2 - Suppl. 1. Ste12's DNA binding domain is highly conserved among fungi.** We used a set of 985 fungal Ste12 protein sequences to examine the frequency of single amino acid changes in nature. Regions I and II defined in Fig. 2 are indicated. Note that S177 and Q180, positions C-terminal of region II that were altered in the hyper-invasive SKQR variant. Positively charged amino acids (red boxes) frequently occur at S177 and very rarely occur at Q180 compared to wild-type *S. cerevisiae* Ste12. Natural variation frequently introduces negatively charged residues (blue boxes) N-terminal of region I, in which mutations decrease mating and increase invasion. These observations support the assertion that wild-type *S. cerevisiae* Ste12 may promote mating more readily than invasion (Fig. 2B).

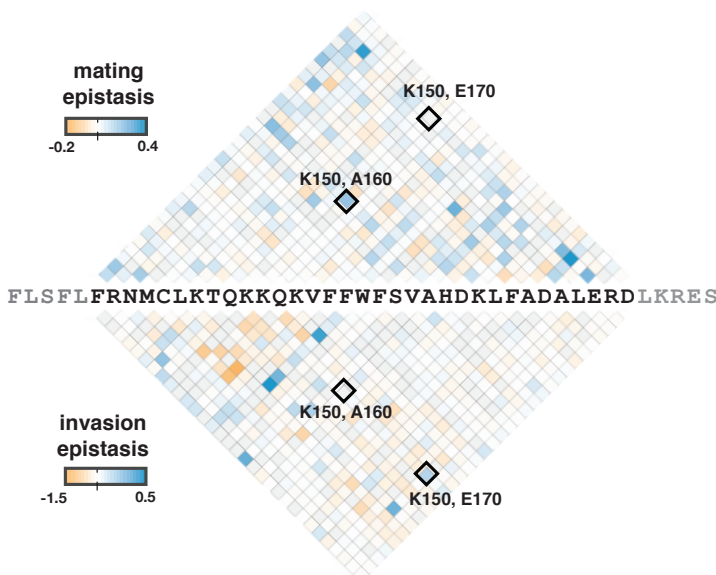

**Fig. 2 - Suppl. 2. Double mutant analysis identifies pairs of positions with strong epistasis, and such pairs differ between mating and invasion.** For each double mutant, we calculated epistasis as the deviation of that mutant's effect from the multiplied effect of its constituent single mutants (see Methods). Scores are displayed as in Fig. 2A; epistasis scores across all combinations of mutations tested at each pair of sites was used to calculate the displayed mean epistasis score. Sites with strong positive (shades of blue) or negative epistasis scores (shades of orange) differ between traits. Strong intramolecular epistasis occurs more frequently between residues in close proximity, suggesting that Ste12 conformation differs between both traits. Two pairs with trait-specific epistatic interactions are indicated in boxes.



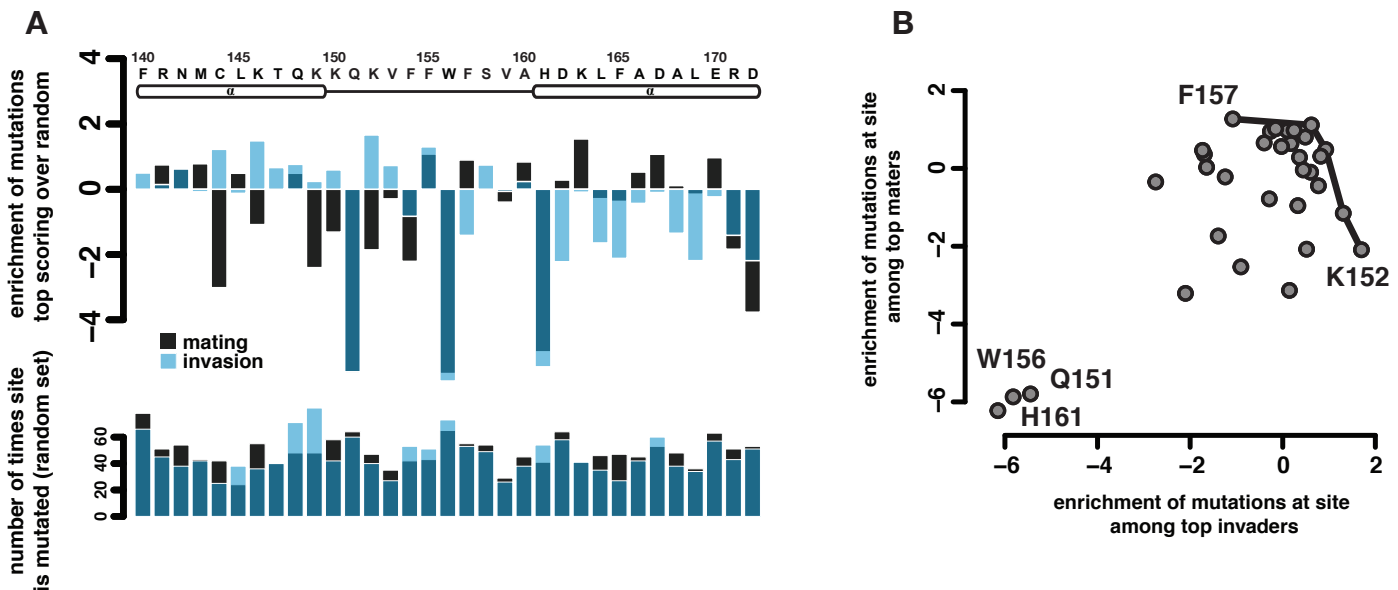

**Fig. 2 - Suppl. 3. Orthogonal analysis reveals positions contributing to 'separation-of-function' and tradeoff between mating and invasion.** Per-site mutation frequencies were calculated for the top 750 mating variants, top 750 invasion variants, and a random set of 750 variants from each dataset. **(A)** Enrichment of per-site mutations for top performing variants in each trait recapitulates bipartite arrangement of effects ('separation-of-function'), as well as sites increasing one trait at the cost of the other (e.g. see K152 and F157, tradeoff indicated with blue/black bars). **(B)** Per-site enrichment scores identify similar sites on the empirical Pareto front (Fig. 2C), as well as the same sites in which mutations are deleterious in both traits.

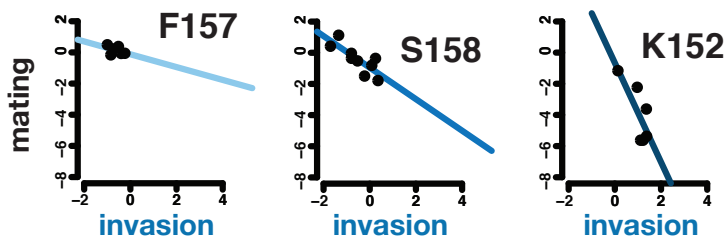

**Fig. 2 - Suppl. 4. Orthogonal analysis reveals positions contributing to 'separation-of-function' and tradeoff between mating and invasion.** Mating and invasion scores for all single amino acid change mutations at each indicated position were plotted, and a simple linear model was fitted. Steeper slopes indicate that mutations at that position are more likely to shift trait preference toward invasion.

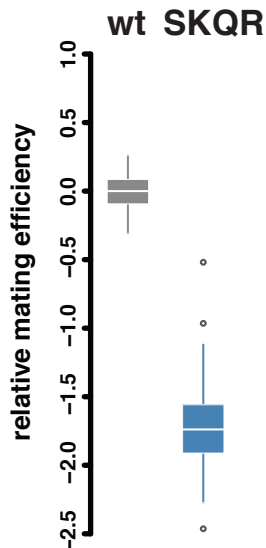

**Fig. 2 - Suppl. 5. SKQR mutant shows decreased mating efficiency.** Because the SKQR variant was not present in our initial Ste12 variant library, we used a standard quantitative mating assay to determine its mating efficiency relative to wild-type Ste12 as in Fig. 4C.

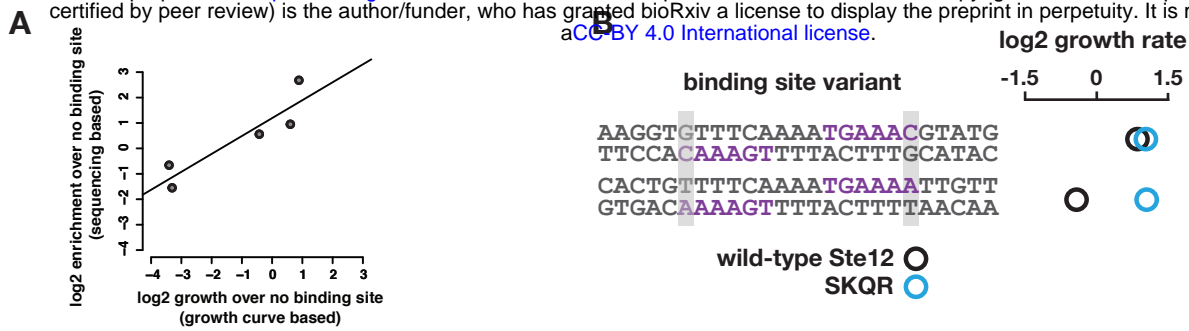

**Fig. 3 - Suppl. 1. Validation of large-scale binding site selection scores.** We tested different Ste12 binding sites with a range of activities identified in the large-scale sequencing-based assay in growth assays with a HIS3 reporter. **(A)** Growth rates of wild-type Ste12 with each binding site correlate with enrichment scores determined by sequencing. **(B)** The altered binding site preference of the SKQR variant is validated in individual growth assays. SKQR, but not wild-type Ste12, can activate a binding site with an A in core position 6.

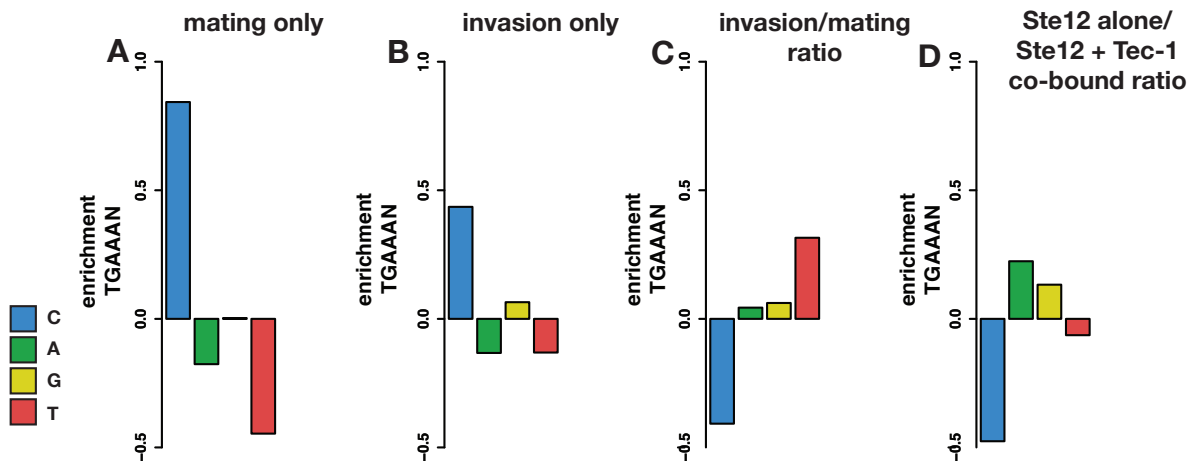

**Fig. 3 - Suppl. 2. ChIP data analysis reveals altered binding site preference at yeast genes implicated in mating or invasion.** TGAAA sites upstream of genes bound by Ste12 in mating **(A)** or invasion **(B)** were analyzed for the frequency of each base in core position 6. Base identities are color-coded. Enrichments were determined by comparing frequencies to those upstream of a random gene set. **(C)** Although both sets show enrichment for C in core position 6, invasion genes show reduced preference for C. **(D)** Repeating this analysis for invasion genes bound by either Ste12 alone or by both Ste12 and Tec1 also shows decreased C preference at Tec1-independent invasion genes.

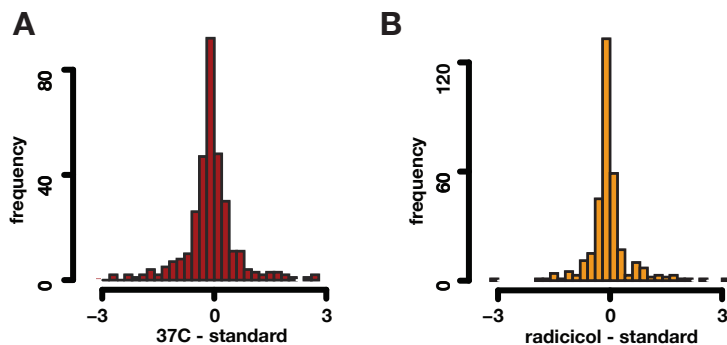

**Fig. 4 - Suppl. 1. The majority of Ste12 variants respond like wild-type Ste12 to increased temperature or Hsp90 inhibition.** The distribution of differences of log<sub>2</sub> mating scores for all single mutants (treated - untreated) are plotted for high-temperature (red, **A**) and Hsp90-reduced (orange, **B**) conditions.
